# Supplementary material for: Childhood motor speech disorders: who to prioritise for genetic testing
Source: Research Square preprint supplement (doi:10.21203/rs.3.rs-6900966/v1), 2025-07-22
Supplement: Supplementary file 1 [file 1492b2763f178631fd8f71d7.docx]

3a. Monogenic variants of unknown significance in participants with genetic diagnoses

| ID | Gene | Variant (GRCh38/hg38) | Chr | Inheritance | ACMG class | Type |
| --- | --- | --- | --- | --- | --- | --- |
| 8 | *FOXP2* | c.1418G>A; p.(Gly473Glu) | 7 | *De novo* | 3 | Missense |
| 5 | *TRRAP* | c.1036C>T; p.(Gln346*) | 7 | Maternal | 3B | Nonsense |

3b. Monogenic variants of unknown significance in participants without genetic diagnoses

|  | Gene | Variant (GRCh38/hg38) | Chr | Inheritance | ACMG class | Type |
| --- | --- | --- | --- | --- | --- | --- |
| 71 | *AP1G1* | c.566-2A>G | 16 | Paternal | 3A | Canonical splice site |
| 98 | *BCORL1* | c.2018G>T; p.(Gly673Val) | X | Maternal | 3B | Missense |
| 134 | *BRPF1* | c.2362G>A; p.(Val788Met) | 3 | *De novo* | 3A | Missense |
| 105 | *CRY1* | c.16G>A; p.(Val6Met) | 12 | *De novo* | 3B | Missense |
| 97 | *DPF2* | c.733C>G; p.(Gln245Glu) | 11 | *De novo* | 3B | Missense |
| 47 | *FGF13* | c.-32C>G | X | Maternal | 3B | Noncoding |
| 49 | *IQSEC2* | c.2770A>G; p.(Ile924Val) | X | Maternal | 3B | Missense |
| 145 | *USP9X* | c.4319T>C; p.(Phe1440Ser) | X | Maternal | 3A | Missense |
| 121 | *USP9X* | c.5428A>G; p.(Ile1810Val) | X | Maternal | 3B | Missense |

3c. Copy number variants (CNVs) of unknown significance in participants without genetic diagnoses

| ID | Genetic finding | Molecular karyotype (GRCh38/hg38) | Inheritance |
| --- | --- | --- | --- |
| 115 | 2q37.2q37.3 del | 2q37.2-37.3(chr2:235014182-237461504)x1 | Maternal |
| 85 | 3p14.2 del | 3p14.2(chr3:62526259-62825083)x1 | *De novo* |
| 113 | 7p22.3 del | 7p22.3(ch7:1436742-1798288)x1 | Maternal |
| 81 | 14q12 del | 14q12(chr14:29558905-31072968)x1 | *De novo* |
